# Supplementary material for: Atmospheric chemistry of alkyl iodides: theoretical studies on the mechanisms and kinetics of CH3I/C2H5I + NO3reactions
Source: Royal Society of Chemistry journal article supplement (doi:10.1039/c5ra16215g), 2015-01-01

**Table S1.** Calculated frequencies (in  $\text{cm}^{-1}$ ) and  $\langle s^2 \rangle$  values for the reactants, products, transition states, and hydrogen-bonded complexes for the title reactions at the B3LYP/I level.

| species                                         | B3LYP/I                                                                                                                                                                    | $\langle s^2 \rangle$ |
|-------------------------------------------------|----------------------------------------------------------------------------------------------------------------------------------------------------------------------------|-----------------------|
| CH <sub>3</sub> I                               | 528, 888, 889, 1277, 1469, 4169, 3082, 3192, 3193                                                                                                                          | 0.0                   |
| C <sub>2</sub> H <sub>5</sub> I                 | 252, 252, 495, 747, 968, 991, 1062, 1235, 1255, 1411, 1480, 1484, 1494, 3016, 3081, 3100, 3110, 3160                                                                       | 0.0                   |
| NO <sub>3</sub>                                 | 272, 295, 800, 1092, 1118, 1135                                                                                                                                            | 0.756                 |
| CH <sub>2</sub> I                               | 166, 611, 849, 1351, 3159, 3315                                                                                                                                            | 0.756                 |
| CH <sub>3</sub> CHI                             | 141, 264, 339, 552, 991, 998, 1097, 1241, 1402, 1461, 1478, 2966, 3040, 3081, 3202                                                                                         | 0.755                 |
| CH <sub>2</sub> CH <sub>2</sub> I               | 70, 114, 231, 836, 964, 993, 1005, 1239, 1362, 1474, 1639, 3139, 3147, 3218, 3244                                                                                          | 0.752                 |
| HNO <sub>3</sub>                                | 457, 586, 648, 773, 896, 1319, 1348, 1756, 3729                                                                                                                            | 0.0                   |
| CH <sub>3</sub> NO <sub>3</sub>                 | 131, 198, 336, 569, 661, 768, 863, 1013, 1163, 1188, 1324, 1458, 1470, 1498, 1714, 3052, 3136, 3156                                                                        | 0.0                   |
| CH <sub>3</sub> CH <sub>2</sub> NO <sub>3</sub> | 84, 122, 223, 253, 370, 566, 704, 768, 827, 869, 919, 1023, 1139, 1175, 1288, 1315, 1398, 1423, 1484, 1499, 1519, 1704, 3043, 3058, 3101, 3110, 3126                       | 0.0                   |
| TS1a                                            | 1428 <i>i</i> , 24, 64, 72, 120, 414, 433, 602, 684, 736, 784, 893, 928, 994, 1191, 1307, 1368, 1379, 1626, 3107, 3220                                                     | 0.756                 |
| TS2a                                            | 1536 <i>i</i> , 15, 51, 79, 168, 406, 455, 595, 679, 711, 786, 907, 934, 988, 1197, 1305, 1379, 1394, 1624, 3100, 3213                                                     | 0.756                 |
| TS3a                                            | 683 <i>i</i> , 44, 64, 88, 125, 168, 223, 600, 680, 786, 858, 968, 985, 1060, 1261, 1377, 1404, 1551, 3123, 3296, 3325                                                     | 0.774                 |
| TS1b                                            | 1193 <i>i</i> , 28, 58, 73, 128, 172, 225, 272, 433, 549, 686, 740, 786, 809, 946, 975, 1051, 1069, 1199, 1275, 1308, 1348, 1400, 1471, 1480, 1613, 3018, 3080, 3109, 3128 | 0.756                 |
| TS2b                                            | 1072 <i>i</i> , 36, 48, 54, 109, 148, 191, 474, 490, 549, 681, 760, 773, 784, 937, 981, 1028, 1068, 1188, 1247, 1257, 1309, 1339, 1464, 1493, 1617, 3078, 3123, 3156, 3201 | 0.758                 |
| TS3b                                            | 1370 <i>i</i> , 23, 46, 86, 105, 192, 271, 432, 493, 504, 674, 727, 742, 780, 908, 972, 997, 1046, 1138, 1231, 1250, 1319, 1334, 1430, 1449, 1641, 3047, 3055, 3139, 3153  | 0.756                 |
| TS4b                                            | 563 <i>i</i> , 33, 53, 64, 93, 142, 174, 202, 284, 608, 693, 793, 818, 893, 931, 975, 1025, 1069, 1197, 1259, 1403, 1447, 1475, 1491, 1526, 3035, 3103, 3139, 3172, 3260   | 0.777                 |
| EP1a                                            | 21, 30, 58, 63, 123, 225, 575, 606, 610, 631, 663, 779, 864, 910, 1333, 1357, 1366, 1738, 3135, 3281, 3446                                                                 | 0.755                 |
| EP2a                                            | 28, 36, 60, 80, 103, 241, 589, 604, 616, 628, 658, 779, 870, 903, 1326, 1345, 1359, 1731, 3118, 3262, 3481                                                                 | 0.755                 |
| EP3a                                            | 12, 23, 36, 142, 198, 337, 570, 663, 768, 864, 1012, 1168, 1189, 1323, 1457, 1470, 1497, 1711, 3055, 3140, 3158                                                            | 0.752                 |

|      |                                                                                                                                                                  |       |
|------|------------------------------------------------------------------------------------------------------------------------------------------------------------------|-------|
| EP1b | 21, 39, 48, 67, 90, 135, 189, 271, 526, 585, 610, 660, 665, 782, 913, 988, 1003, 1090, 1247, 1333, 1368, 1399, 1468, 1473, 1734, 2976, 3053, 3096, 3172, 3404    | 0.755 |
| EP2b | 21, 23, 29, 47, 57, 70, 111, 112, 265, 561, 599, 658, 779, 837, 903, 991, 1012, 1033, 1241, 1332, 1358, 1363, 1474, 1640, 1746, 3134, 3142, 3213, 3239, 3594     | 0.752 |
| EP3b | 27, 40, 53, 55, 59, 68, 96, 134, 297, 581, 610, 671, 782, 836, 921, 987, 996, 1006, 1241, 1333, 1355, 1362, 1467, 1624, 1730, 3142, 3149, 3226, 3251, 3456       | 0.752 |
| EP4b | 23, 28, 58, 91, 124, 227, 251, 375, 567, 708, 768, 826, 875, 916, 1020, 1137, 1174, 1289, 1308, 1398, 1422, 1484, 1498, 1518, 1689, 3043, 3062, 3105, 3111, 3129 | 0.752 |

---

**Table S2.** The vertical excitation energy  $T_V$  in eV and oscillator strength  $f$  in atomic units for the first 15 excited states of CH<sub>3</sub>I, C<sub>2</sub>H<sub>5</sub>I, EP1a, EP2a, EP1b, EP2b, and EP3b.

| Excited states | CH <sub>3</sub> I | C <sub>2</sub> H <sub>5</sub> I | EP1a   | EP2a   | EP1b   | EP2b   | EP3b   |
|----------------|-------------------|---------------------------------|--------|--------|--------|--------|--------|
|                | $T_V$             |                                 |        |        |        |        |        |
| 1              | 4.6555            | 4.6442                          | 2.9140 | 2.9282 | 3.1866 | 0.5116 | 0.9295 |
| 2              | 4.6556            | 4.6811                          | 3.6263 | 3.6422 | 3.3269 | 0.5553 | 1.1049 |
| 3              | 6.0560            | 5.9520                          | 3.6671 | 3.7186 | 3.4963 | 3.4077 | 3.3507 |
| 4              | 6.0562            | 5.9920                          | 3.7402 | 3.7775 | 3.7964 | 3.7339 | 3.5105 |
| 5              | 7.0910            | 6.6455                          | 3.8959 | 3.9212 | 3.9235 | 3.9187 | 3.9302 |
| 6              | 7.0910            | 6.6852                          | 4.1513 | 4.1441 | 4.1336 | 4.0398 | 4.0054 |
| 7              | 7.1176            | 6.8049                          | 4.6406 | 4.6594 | 4.6565 | 4.1587 | 4.0744 |
| 8              | 7.1305            | 6.8252                          | 4.7217 | 4.6714 | 4.7002 | 4.2451 | 4.1183 |
| 9              | 7.3913            | 6.8900                          | 4.7398 | 4.7237 | 4.7751 | 4.2900 | 4.2667 |
| 10             | 7.3916            | 6.9069                          | 4.8610 | 4.9283 | 4.8172 | 4.3318 | 4.4050 |
| 11             | 7.8962            | 7.4089                          | 4.9117 | 4.9794 | 5.0019 | 4.4965 | 4.4623 |
| 12             | 7.8963            | 7.5430                          | 5.1862 | 5.2116 | 5.0320 | 4.5398 | 4.4680 |
| 13             | 7.9586            | 7.5613                          | 5.2807 | 5.2920 | 5.1004 | 4.5436 | 4.6358 |
| 14             | 8.0588            | 7.6038                          | 5.3326 | 5.3369 | 5.1453 | 4.6827 | 4.6452 |
| 15             | 8.0880            | 7.7124                          | 5.3717 | 5.3614 | 5.2649 | 4.7393 | 4.6733 |
|                | $f$               |                                 |        |        |        |        |        |
| 1              | 0.0001            | 0.0                             | 0.0    | 0.0    | 0.0    | 0.0    | 0.0002 |
| 2              | 0.0001            | 0.0                             | 0.0089 | 0.0137 | 0.0002 | 0.0001 | 0.0    |
| 3              | 0.0565            | 0.045                           | 0.0083 | 0.0002 | 0.0    | 0.2093 | 0.1272 |
| 4              | 0.0565            | 0.0573                          | 0.055  | 0.0475 | 0.0569 | 0.0001 | 0.0786 |
| 5              | 0.0001            | 0.0059                          | 0.0    | 0.0    | 0.0    | 0.0    | 0.0    |
| 6              | 0.0001            | 0.0038                          | 0.0    | 0.0    | 0.0    | 0.0012 | 0.0029 |
| 7              | 0.0               | 0.0184                          | 0.0    | 0.0    | 0.0    | 0.0    | 0.0    |
| 8              | 0.0387            | 0.0072                          | 0.0001 | 0.0001 | 0.0    | 0.0    | 0.0    |
| 9              | 0.0696            | 0.0558                          | 0.0    | 0.0024 | 0.0001 | 0.0029 | 0.0    |
| 10             | 0.0697            | 0.0576                          | 0.0001 | 0.0001 | 0.0001 | 0.0    | 0.0012 |
| 11             | 0.0055            | 0.1918                          | 0.0001 | 0.0001 | 0.0026 | 0.0    | 0.0001 |
| 12             | 0.0055            | 0.0013                          | 0.0    | 0.0    | 0.001  | 0.0044 | 0.0    |
| 13             | 0.1251            | 0.0312                          | 0.0011 | 0.0011 | 0.0004 | 0.0002 | 0.0013 |
| 14             | 0.0               | 0.0209                          | 0.0001 | 0.0    | 0.0018 | 0.0004 | 0.0    |
| 15             | 0.0036            | 0.0799                          | 0.0    | 0.0    | 0.0002 | 0.0    | 0.0    |

**Figure S1.** Classical potential energy curve ( $V_{\text{MEP}}$ ), ground-state vibrational adiabatic energy curve ( $V_a^G$ ), and zero-point energy curve (ZPE) as functions of  $s$  ( $\text{amu}^{1/2}\text{bohr}$ ) at the CCSD(T)/II//B3LYP/I level for the reaction channels R1a (a), and R1b (b).

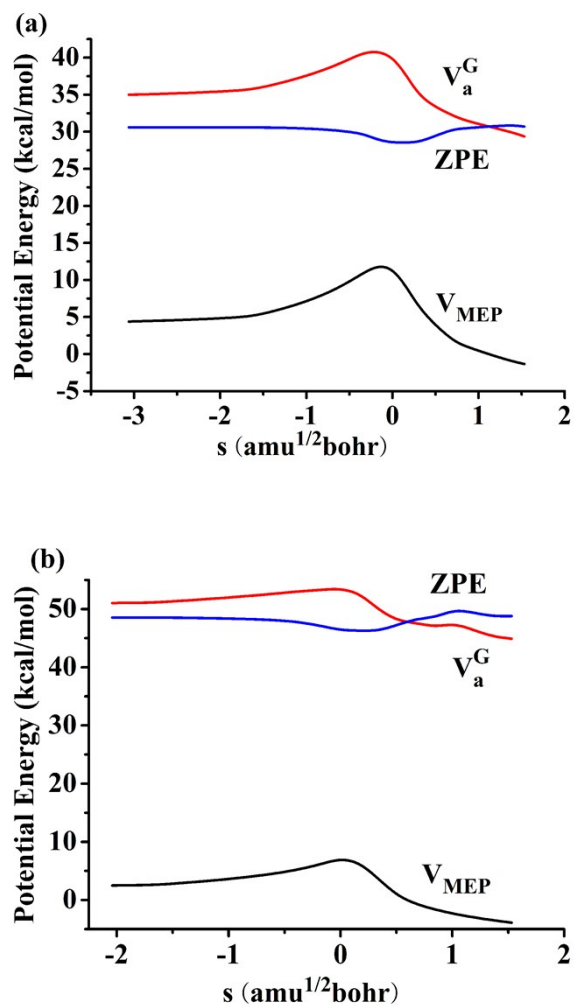

**Figure S2.** Changes of generalized normal-mode vibrational frequencies as functions of  $s$  ( $\text{amu}^{1/2}\text{bohr}$ ) at the CCSD(T)/II//B3LYP/I level for reaction R1a via TS1a (a), and R1b via TS1b (b).

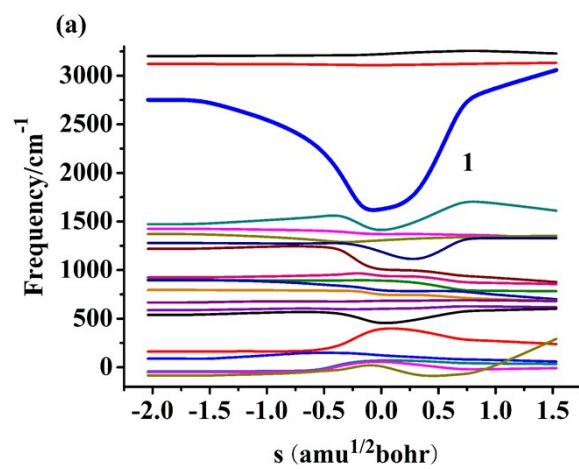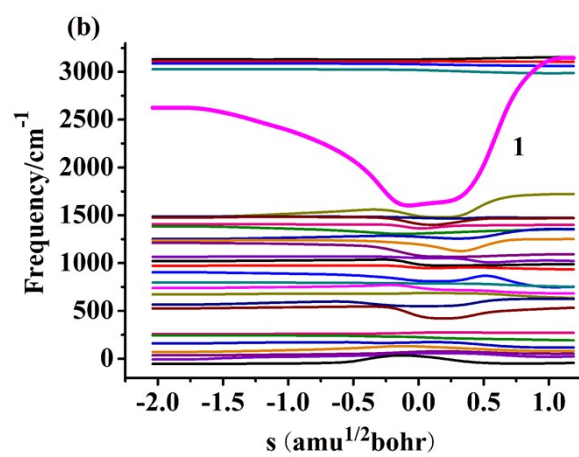

**Figure S3.** The wavelength in nm and oscillator strength in atomic unit at the TD-B3LYP level (a) for  $\text{CH}_3\text{I}$ ,  $\text{C}_2\text{H}_5\text{I}$ ; (b) for EP1a, EP2a; (c) for EP1b, EP2b, and EP3b.

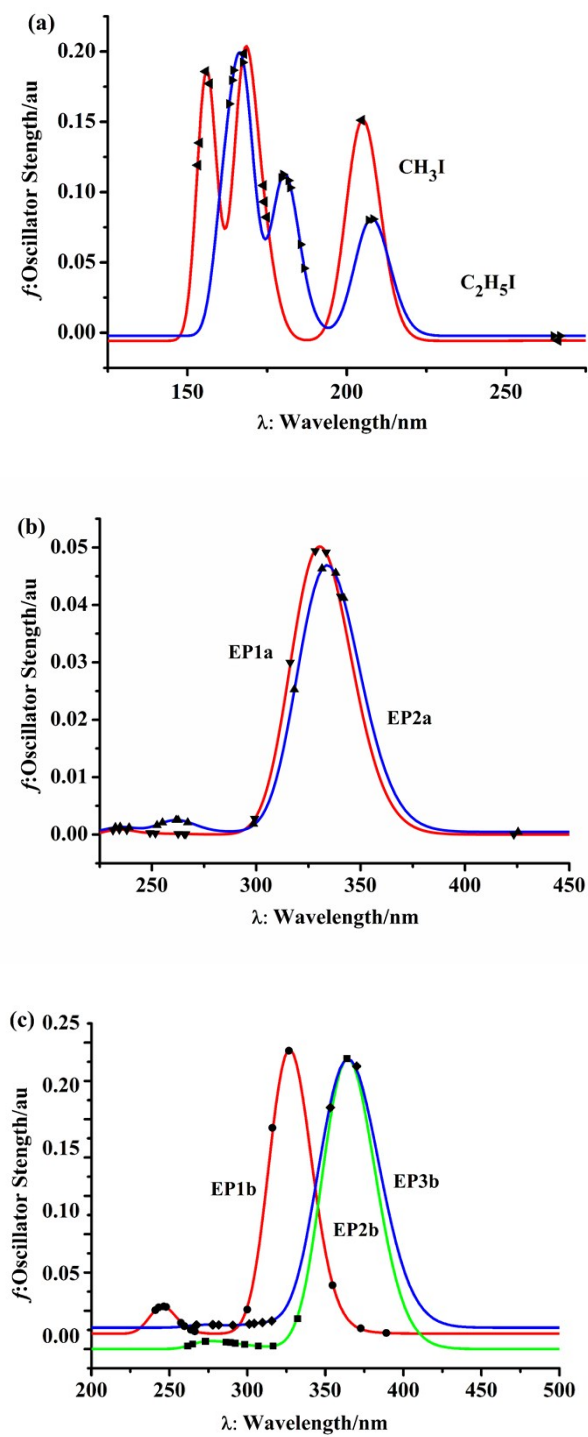

Supplement: c5ra16215g1.pdf [file c5ra16215g1.pdf]
